# Supplementary material
Source: PubMed Central journal article supplement (PMC5386838)
Supplement: NIHMS844650-supplement-Supp_Fig_S1-S3.pdf [file NIHMS844650-supplement-Supp_Fig_S1-S3.pdf]

| Vector   | DC-STAMP         | Recipient cells | N'- terminus | C'- terminus | Assay                                      |
|----------|------------------|-----------------|--------------|--------------|--------------------------------------------|
| pCDNA3.1 | (1) wt<br>(2) TD | 293T cells      | none         | GFP          | confocal microscopy                        |
| pMX      | (3) wt<br>(4) TD | BMM*            | none         | GFP          | confocal microscopy & osteoclast formation |
| pCDNA3.1 | (5) wt<br>(6) TD | 293T cells      | Rhodopsin    | m-Cherry     | confocal microscopy                        |
| pMX      | (7) wt<br>(8) TD | BMM*            | Rhodopsin    | GFP          | confocal microscopy & osteoclast formation |

\*BMM= Bone Marrow Macrophage

### Supplemental Figure S1

|            |                                                                         |                           |                                |
|------------|-------------------------------------------------------------------------|---------------------------|--------------------------------|
|            | <b>N<sup>o</sup> terminus</b>                                           | <b>TM1</b>                | <b>IL1</b>                     |
| Rhodopsin  | MNGTEGPNFYVPSNKTGVVRSPEAPQYYLAEPW                                       | QFSMLAAYMFLMLGFPINFLTLY   | VTVQHKKLRTPLNYY                |
| DC-STAMP   | MRLWTLGTSIFLRLWGTYYVFRSPSWLDFIQHLG                                      | VCCFVAFLSVSLFSAAF         | YWLP                           |
| PA-DCSTAMP | MNGTEGPNFYVPSNKTGVVRSPEAPQYYLAEPW                                       | QFSMLAAYMFLMLGFPINFLTLY   | VTVQHKKLRTPLNYY                |
|            | <b>TM2</b>                                                              | <b>EL1</b>                | <b>TM3</b>                     |
| Rhodopsin  | LLNLAVADLFMVFGGFTTLYTSLH                                                | GYFVFGPTGCNL              | EGFFATLGGELWLVVLAIE            |
| DC-STAMP   | PVALLSSVWMTCVLCCS                                                       | KRARCILLAVLSCGLREGR       | NALJAAGTGVVIFGHVENI            |
| PA-DCSTAMP | LLNLAVADLFMVFGGFTTLYTSLH                                                | GYFVFGPTGCNL              | EGFFATLGGELWLVVLAIE            |
|            | <b>IL2</b>                                                              | <b>TM4</b>                | <b>EL2</b>                     |
| Rhodopsin  | RYVVVCKPMSNFRFGENHA                                                     | IMGVAFTWVMALACAAPPLVGWS   | RYIEGMCQSCGIDYTPHETNN          |
| DC-STAMP   | FYNFRGLLDSMTCNLRKSFVHFPLLR                                              | YTEAIQWYGLATPLNLFDD       | LVSWNQTIVVSLFSPSHALEAHM        |
| PA-DCSTAMP | FYNFRGLLDSMTCNLRKSFVHFPLLR                                              | IMGVAFTWVMALACAAPPLVGWS   | RYIEGMCQSCGIDYTPHETNN          |
|            | <b>EL2</b>                                                              | <b>TM5</b>                | <b>IL3</b>                     |
| Rhodopsin  | NDTRGEVLGVLIHVMVVTTELLTSVGQK                                            | ESFVIYMFVVIHPIVIFFCYG     | QLVFTVKEAAQQESATTQKAEKVTM      |
| DC-STAMP   |                                                                         | LLALAGLLLVSTGLFL          | KRFLGPCGWKYENVYITKQFVRFDEKERHQ |
| PA-DCSTAMP |                                                                         | ESFVIYMFVVIHPIVIFFCYG     | KRFLGPCGWKYENVYITKQFVRFDEKERHQ |
|            | <b>IL3</b>                                                              | <b>TM6</b>                | <b>EL3</b>                     |
| Rhodopsin  |                                                                         | VIIIMVIAFLICWLPYAGVAFYIFT | HQGSDFG                        |
| DC-STAMP   | QRPCVPLNKKERKKYVIVPSLQLTPKEKKTG                                         | LFLLPVLTYLYMWWLFAAV       | DYLLYRLISSMNKQFQSLPGLVHILKL    |
| PA-DCSTAMP | QRPCVPLNKKERKKYVIVPSLQLTPKEKKTG                                         | VIIIMVIAFLICWLPYAGVAFYIFT | HQGSDFG                        |
|            | <b>EL3</b>                                                              | <b>TM7</b>                |                                |
| Rhodopsin  |                                                                         | PIFMTIPAFFAKTSAVYNPVIYIMM |                                |
| DC-STAMP   | RGEKQGTQGVVHDSAFNISMFEPCPKPRLSVSETWV                                    | PLSHLLTILJLLSSMLM         |                                |
| PA-DCSTAMP |                                                                         | PIFMTIPAFFAKTSAVYNPVIYIMM |                                |
|            | <b>cytoplasmic tail</b>                                                 |                           |                                |
| Rhodopsin  | NKQFRNCMVTTLCCGKNPLGDDEASTVSKTETSQVAPA                                  |                           |                                |
| DC-STAMP   | QLKILVSVSFYPKVERERIEYLHAKLLEKRSKQPLREADGKPSLYFKKIHFVFPVLKMRKKQTIPANEDDL |                           |                                |
| PA-DCSTAMP | QLKILVSVSFYPKVERERIEYLHAKLLEKRSKQPLREADGKPSLYFKKIHFVFPVLKMRKKQTIPANEDDL |                           |                                |

Supplemental  
Figure S2

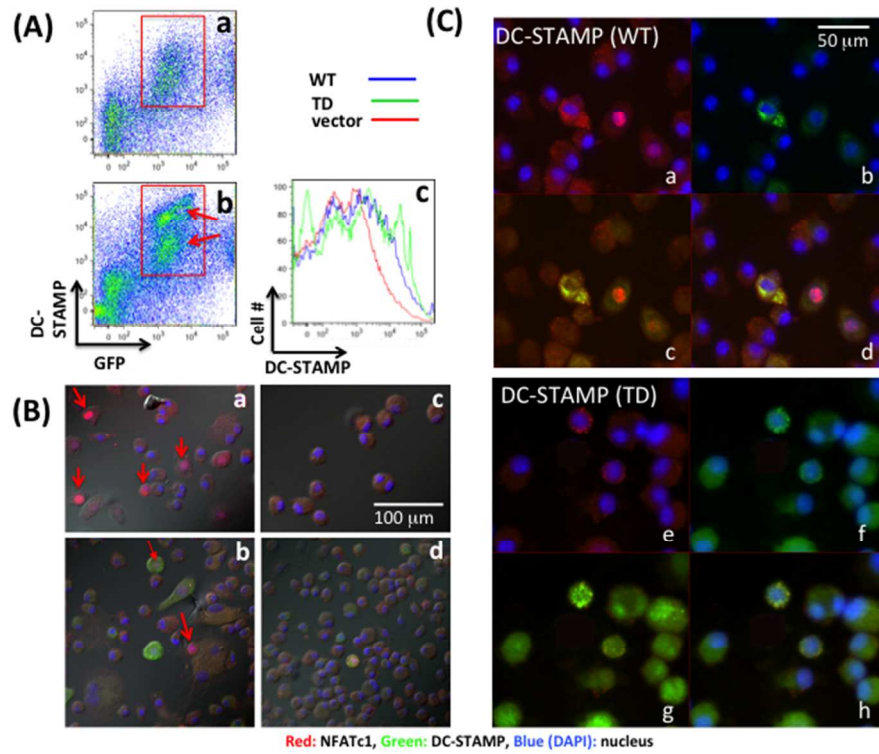

Suppl.  
Figure S3
